# Supplementary material for: Quantitative high-throughput profiling of snake venom gland transcriptomes and proteomes (Ovophis okinavensis and Protobothrops flavoviridis)
Source: PubMed Central journal article supplement (PMC3840601; doi:10.1186/1471-2164-14-790), 2013-11-14

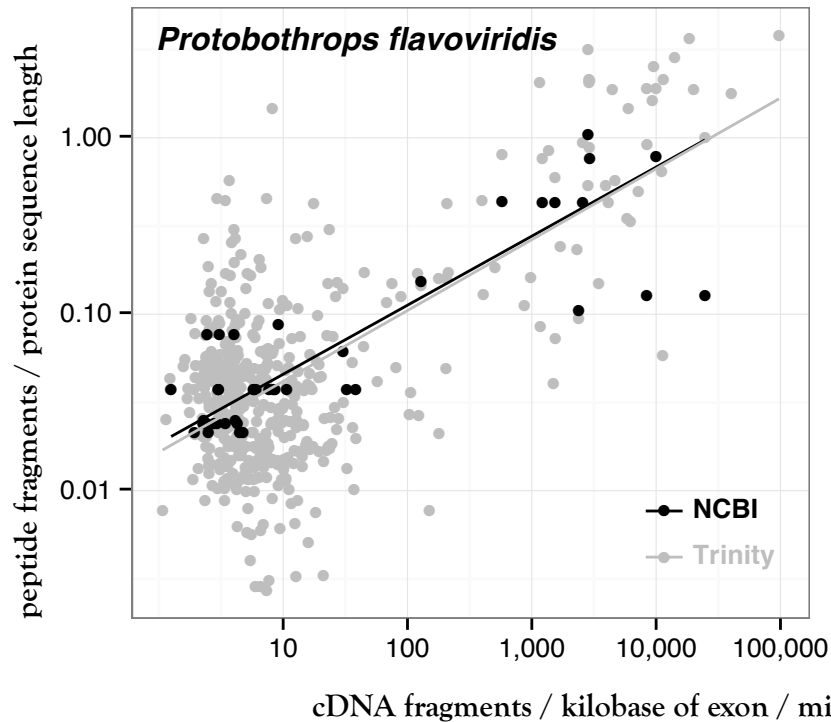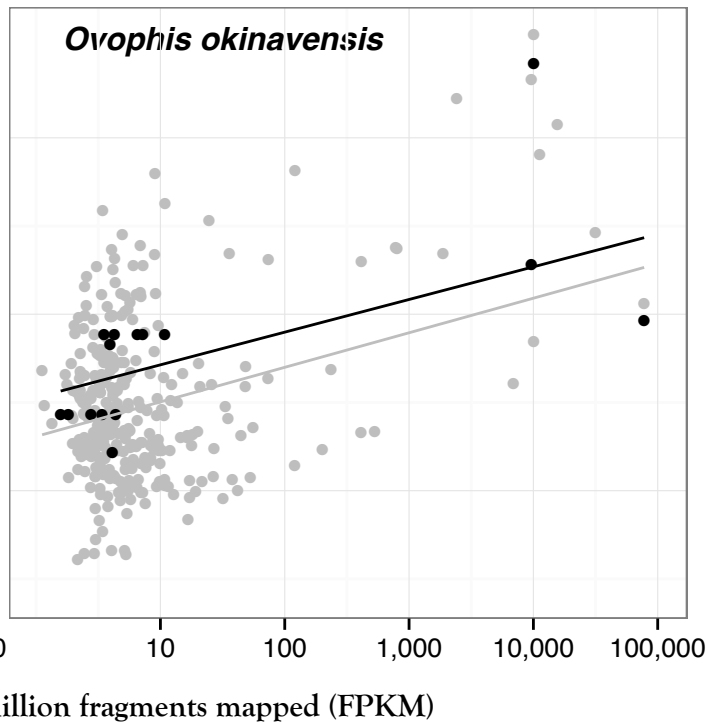

Supplement: 1471-2164-14-790-S8.pdf [file 1471-2164-14-790-S8.pdf]
