# Supplementary material for: Quantitative high-throughput profiling of snake venom gland transcriptomes and proteomes (Ovophis okinavensis and Protobothrops flavoviridis)
Source: PubMed Central journal article supplement (PMC3840601; doi:10.1186/1471-2164-14-790), 2013-11-14
Supplement: 1471-2164-14-790-S13.pdf [file 1471-2164-14-790-S13.pdf]

| Species                             | Name            | ID          | 1 | 10 | 20 | 30 | 40 | 50 | 60 | 70 | 80 | 90 | 100 | 110 | 120 | 130 | 140 | 150 | 160 | 170 | 180 | 190 |   |   |   |   |   |   |   |   |   |   |   |   |   |   |   |   |   |   |   |   |   |   |   |   |   |   |   |   |   |   |   |   |   |   |   |   |   |   |   |   |   |   |   |   |   |   |   |   |   |   |   |   |   |   |   |   |   |   |   |   |   |   |   |   |   |   |   |   |   |   |   |   |   |   |   |   |   |   |   |   |   |   |   |   |   |   |   |   |   |   |   |   |   |   |   |   |   |   |   |   |   |   |   |   |   |   |   |   |   |   |   |   |   |   |   |   |   |   |   |   |   |   |   |   |   |   |   |   |   |   |   |   |   |   |   |   |   |   |   |   |   |   |   |   |   |   |   |   |   |   |   |   |   |   |   |   |   |   |   |   |   |   |   |   |   |   |
|-------------------------------------|-----------------|-------------|---|----|----|----|----|----|----|----|----|----|-----|-----|-----|-----|-----|-----|-----|-----|-----|-----|---|---|---|---|---|---|---|---|---|---|---|---|---|---|---|---|---|---|---|---|---|---|---|---|---|---|---|---|---|---|---|---|---|---|---|---|---|---|---|---|---|---|---|---|---|---|---|---|---|---|---|---|---|---|---|---|---|---|---|---|---|---|---|---|---|---|---|---|---|---|---|---|---|---|---|---|---|---|---|---|---|---|---|---|---|---|---|---|---|---|---|---|---|---|---|---|---|---|---|---|---|---|---|---|---|---|---|---|---|---|---|---|---|---|---|---|---|---|---|---|---|---|---|---|---|---|---|---|---|---|---|---|---|---|---|---|---|---|---|---|---|---|---|---|---|---|---|---|---|---|---|---|---|---|---|---|---|---|---|---|---|---|---|---|---|---|
| <i>Protobothrops flavoviridis</i>   | CTL 07 F IX/BPA | AB848122    | V | S  | T  | Q  | S  | T  | W  | G  | K  | P  | G   | V   | A   | S   | E   | Q   | T   | S   | Y   | L   | W | R | P | K | E | - | - | - | R | G | R | K | T | M | G | R | F | I | F | M | S | F | G | L | L | V | V | A | A | S | L | R | G | T | G | A | - | - | D | C | L | S | G | W | S | S | Y | E | G | H | C | Y | K | A | F | K | Y | K | T | W | D | A | E | R | F | C | T | Q | A | K | G | H | L | V | S | I | E | S | A | G | E | A | D | F | V | A | Q | L | V | A | E | N | I | Q | N | T | K | S | Y | V | W | I | G | L | R | V | Q | G | K | E | K | Q | C | S | S | E | W | S | D | G | S | S | V | S | Y | N | L | V | K | P | F | S | K | K | C | F | V | L | K | K | S | E | F | R | K | W | F | N | V | Y | C | G | Q | Q | Y | V | F | M | C | K | F | L | R | P | R | * |
| <i>Protobothrops flavoviridis</i>   | CTL 06 F IX/BPA | AB848121    | V | S  | T  | Q  | S  | T  | W  | G  | K  | P  | G   | V   | A   | S   | E   | Q   | T   | S   | Y   | L   | W | R | P | K | E | - | - | - | R | G | R | K | T | M | G | R | F | I | F | M | S | F | G | L | L | V | V | A | A | S | L | R | G | T | G | A | - | - | D | C | L | S | G | W | S | S | Y | E | G | H | C | Y | K | A | F | K | Y | K | T | W | D | A | E | R | F | C | T | Q | A | K | G | H | L | V | S | I | E | S | A | G | E | A | D | F | V | A | Q | L | V | A | E | N | I | Q | N | T | K | S | Y | V | W | I | G | L | R | V | Q | G | K | E | K | Q | C | S | S | E | W | S | D | G | S | S | V | S | Y | N | L | V | K | P | F | S | K | K | C | F | V | L | K | K | S | E | F | R | K | W | F | N | V | Y | C | G | Q | Q | Y | V | F | M | C | K | F | L | R | P | R | * |
| <i>Protobothrops flavoviridis</i>   | CTL 10 F IX/BPA | AB848123    | V | S  | T  | Q  | S  | T  | W  | G  | K  | P  | G   | V   | A   | S   | E   | Q   | T   | S   | Y   | L   | W | R | P | K | E | - | - | - | R | G | R | K | T | M | G | R | F | I | F | M | S | F | G | L | L | V | V | A | A | S | L | R | G | T | G | A | - | - | D | C | L | S | G | W | S | S | Y | E | G | H | C | Y | K | A | F | K | Y | K | T | W | D | A | E | R | F | C | T | Q | A | K | G | H | L | V | S | I | E | S | A | G | E | A | D | F | V | A | Q | L | V | A | E | N | I | Q | N | T | K | S | Y | V | W | I | G | L | R | V | Q | G | K | E | K | Q | C | S | S | E | W | S | D | G | S | S | V | S | Y | N | L | V | K | P | F | S | K | K | C | F | V | L | K | K | S | E | F | R | K | W | F | N | V | Y | C | G | Q | Q | Y | V | F | M | C | K | F | L | R | P | R | * |
| <i>Protobothrops flavoviridis</i>   | CTL 08 F IX/BPA | AB848119    | V | S  | T  | Q  | S  | T  | W  | G  | K  | P  | G   | V   | A   | S   | E   | Q   | T   | S   | Y   | L   | W | R | P | K | E | - | - | - | R | G | R | K | T | M | G | R | F | I | F | M | S | F | G | L | L | V | V | A | A | S | L | R | G | T | G | A | - | - | D | C | L | S | G | W | S | S | Y | E | G | H | C | Y | K | A | F | K | Y | K | T | W | D | A | E | R | F | C | T | Q | A | K | G | H | L | V | S | I | E | S | A | G | E | A | D | F | V | A | Q | L | V | A | E | N | I | Q | N | T | K | S | Y | V | W | I | G | L | R | V | Q | G | K | E | K | Q | C | S | S | E | W | S | D | G | S | S | V | S | Y | N | L | V | K | P | F | S | K | K | C | F | V | L | K | K | S | E | F | R | K | W | F | N | V | Y | C | G | Q | Q | Y | V | F | M | C | K | F | L | R | P | R | * |
| <i>Protobothrops flavoviridis</i>   | CTL 09 F IX/BPA | AB848122    | V | S  | T  | Q  | S  | T  | W  | G  | K  | P  | G   | V   | A   | S   | E   | Q   | T   | S   | Y   | L   | W | R | P | K | E | - | - | - | R | G | R | K | T | M | G | R | F | I | F | M | S | F | G | L | L | V | V | A | A | S | L | R | G | T | G | A | - | - | D | C | L | S | G | W | S | S | Y | E | G | H | C | Y | K | A | F | K | Y | K | T | W | D | A | E | R | F | C | T | Q | A | K | G | H | L | V | S | I | E | S | A | G | E | A | D | F | V | A | Q | L | V | A | E | N | I | Q | N | T | K | S | Y | V | W | I | G | L | R | V | Q | G | K | E | K | Q | C | S | S | E | W | S | D | G | S | S | V | S | Y | N | L | V | K | P | F | S | K | K | C | F | V | L | K | K | S | E | F | R | K | W | F | N | V | Y | C | G | Q | Q | Y | V | F | M | C | K | F | L | R | P | R | * |
| <i>Protobothrops flavoviridis</i>   | CTL 11 F IX/BPB | AB848145    | V | S  | T  | Q  | S  | T  | W  | G  | K  | P  | G   | V   | A   | S   | E   | Q   | T   | S   | Y   | L   | W | R | P | K | E | - | - | - | R | G | R | K | T | M | G | R | F | I | F | M | S | F | G | L | L | V | V | A | A | S | L | R | G | T | G | A | - | - | D | C | L | S | G | W | S | S | Y | E | G | H | C | Y | K | A | F | K | Y | K | T | W | D | A | E | R | F | C | T | Q | A | K | G | H | L | V | S | I | E | S | A | G | E | A | D | F | V | V | K | L | A | F | Q | T | F | G | H | S | I | F | W | M | G | L | S | N | V | W | N | Q | C | N | W | Q | W | S | N | A | A | M | L | R | Y | K | A | W | A | E | L | S | Y | C | V | Y | F | K | S | T | N | N | K | W | R | S | R | A | C | R | M | M | A | Q | F | V | C | * |   |   |   |   |   |   |   |   |   |   |   |   |
| <i>Crotalus durissus terrificus</i> | Convulxin A     | gi 39654957 | V | S  | T  | Q  | S  | T  | W  | G  | K  | P  | G   | V   | A   | S   | E   | Q   | T   | S   | Y   | L   | W | R | P | K | E | - | - | - | R | G | R | K | T | M | G | R | F | I | F | M | S | F | G | L | L | V | V | A | A | S | L | R | G | T | G | A | - | - | D | C | L | S | G | W | S | S | Y | E | G | H | C | Y | K | A | F | K | Y | K | T | W | D | A | E | R | F | C | T | Q | A | K | G | H | L | V | S | I | E | S | A | G | E | A | D | F | V | V | K | L | A | F | Q | T | F | G | H | S | I | F | W | M | G | L | S | N | V | W | N | Q | C | N | W | Q | W | S | N | A | A | M | L | R | Y | K | A | W | A | E | L | S | Y | C | V | Y | F | K | S | T | N | N | K | W | R | S | R | A | C | R | M | M | A | Q | F | V | C | * |   |   |   |   |   |   |   |   |   |   |   |   |
| <i>Protobothrops flavoviridis</i>   | Flavocetin A    | Q8AV97.1    | V | S  | T  | Q  | S  | T  | W  | G  | K  | P  | G   | V   | A   | S   | E   | Q   | T   | S   | Y   | L   | W | R | P | K | E | - | - | - | R | G | R | K | T | M | G | R | F | I | F | M | S | F | G | L | L | V | V | A | A | S | L | R | G | T | G | A | - | - | D | C | L | S | G | W | S | S | Y | E | G | H | C | Y | K | A | F | K | Y | K | T | W | D | A | E | R | F | C | T | Q | A | K | G | H | L | V | S | I | E | S | A | G | E | A | D | F | V | V | K | L | A | F | Q | T | F | G | H | S | I | F | W | M | G | L | S | N | V | W | N | Q | C | N | W | Q | W | S | N | A | A | M | L | R | Y | K | A | W | A | E | L | S | Y | C | V | Y | F | K | S | T | N | N | K | W | R | S | R | A | C | R | M | M | A | Q | F | V | C | * |   |   |   |   |   |   |   |   |   |   |   |   |
| <i>Protobothrops flavoviridis</i>   | CTL 01a         | AB848117    | V | S  | T  | Q  | S  | T  | W  | G  | K  | P  | G   | V   | A   | S   | E   | Q   | T   | S   | Y   | L   | W | R | P | K | E | - | - | - | R | G | R | K | T | M | G | R | F | I | F | M | S | F | G | L | L | V | V | A | A | S | L | R | G | T | G | A | - | - | D | C | L | S | G | W | S | S | Y | E | G | H | C | Y | K | A | F | K | Y | K | T | W | D | A | E | R | F | C | T | Q | A | K | G | H | L | V | S | I | E | S | A | G | E | A | D | F | V | V | K | L | A | F | Q | T | F | G | H | S | I | F | W | M | G | L | S | N | V | W | N | Q | C | N | W | Q | W | S | N | A | A | M | L | R | Y | K | A | W | A | E | L | S | Y | C | V | Y | F | K | S | T | N | N | K | W | R | S | R | A | C | R | M | M | A | Q | F | V | C | * |   |   |   |   |   |   |   |   |   |   |   |   |
| <i>Protobothrops flavoviridis</i>   | CTL 02a         | AB848118    | V | S  | T  | Q  | S  | T  | W  | G  | K  | P  | G   | V   | A   | S   | E   | Q   | T   | S   | Y   | L   | W | R | P | K | E | - | - | - | R | G | R | K | T | M | G | R | F | I | F | M | S | F | G | L | L | V | V | A | A | S | L | R | G | T | G | A | - | - | D | C | L | S | G | W | S | S | Y | E | G | H | C | Y | K | A | F | K | Y | K | T | W | D | A | E | R | F | C | T | Q | A | K | G | H | L | V | S | I | E | S | A | G | E | A | D | F | V | V | K | L | A | F | Q | T | F | G | H | S | I | F | W | M | G | L | S | N | V | W | N | Q | C | N | W | Q | W | S | N | A | A | M | L | R | Y | K | A | W | A | E | L | S | Y | C | V | Y | F | K | S | T | N | N | K | W | R | S | R | A | C | R | M | M | A | Q | F | V | C | * |   |   |   |   |   |   |   |   |   |   |   |   |
| <i>Protobothrops flavoviridis</i>   | CTL 03a         | AB848120    | V | S  | T  | Q  | S  | T  | W  | G  | K  | P  | G   | V   | A   | S   | E   | Q   | T   | S   | Y   | L   | W | R | P | K | E | - | - | - | R | G | R | K | T | M | G | R | F | I | F | M | S | F | G | L | L | V | V | A | A | S | L | R | G | T | G | A | - | - | D | C | L | S | G | W | S | S | Y | E | G | H | C | Y | K | A | F | K | Y | K | T | W | D | A | E | R | F | C | T | Q | A | K | G | H | L | V | S | I | E | S | A | G | E | A | D | F | V | V | K | L | A | F | Q | T | F | G | H | S | I | F | W | M | G | L | S | N | V | W | N | Q | C | N | W | Q | W | S | N | A | A | M | L | R | Y | K | A | W | A | E | L | S | Y | C | V | Y | F | K | S | T | N | N | K | W | R | S | R | A | C | R | M | M | A | Q | F | V | C | * |   |   |   |   |   |   |   |   |   |   |   |   |
| <i>Protobothrops flavoviridis</i>   | CTL 04b         | AB848139    | V | S  | T  | Q  | S  | T  | W  | G  | K  | P  | G   | V   | A   | S   | E   | Q   | T   | S   | Y   | L   | W | R | P | K | E | - | - | - | R | G | R | K | T | M | G | R | F | I | F | M | S | F | G | L | L | V | V | A | A | S | L | R | G | T | G | A | - | - | D | C | L | S | G | W | S | S | Y | E | G | H | C | Y | K | A | F | K | Y | K | T | W | D | A | E | R | F | C | T | Q | A | K | G | H | L | V | S | I | E | S | A | G | E | A | D | F | V | V | K | L | A | F | Q | T | F | G | H | S | I | F | W | M | G | L | S | N | V | W | N | Q | C | N | W | Q | W | S | N | A | A | M | L | R | Y | K | A | W | A | E | L | S | Y | C | V | Y | F | K | S | T | N | N | K | W | R | S | R | A | C | R | M | M | A | Q | F | V | C | * |   |   |   |   |   |   |   |   |   |   |   |   |
| <i>Protobothrops flavoviridis</i>   | CTL 05b         | AB848140    | V | S  | T  | Q  | S  | T  | W  | G  | K  | P  | G   | V   | A   | S   | E   | Q   | T   | S   | Y   | L   | W | R | P | K | E | - | - | - | R | G | R | K | T | M | G | R | F | I | F | M | S | F | G | L | L | V | V | A | A | S | L | R | G | T | G | A | - | - | D | C | L | S | G | W | S | S | Y | E | G | H | C | Y | K | A | F | K | Y | K | T | W | D | A | E | R | F | C | T | Q | A | K | G | H | L | V | S |   |   |   |   |   |   |   |   |   |   |   |   |   |   |   |   |   |   |   |   |   |   |   |   |   |   |   |   |   |   |   |   |   |   |   |   |   |   |   |   |   |   |   |   |   |   |   |   |   |   |   |   |   |   |   |   |   |   |   |   |   |   |   |   |   |   |   |   |   |   |   |   |   |   |   |   |   |   |   |   |   |   |   |   |   |   |   |   |   |   |   |
