# Supplementary material for: Quantitative high-throughput profiling of snake venom gland transcriptomes and proteomes (Ovophis okinavensis and Protobothrops flavoviridis)
Source: PubMed Central journal article supplement (PMC3840601; doi:10.1186/1471-2164-14-790), 2013-11-14
Supplement: 1471-2164-14-790-S14.pdf [file 1471-2164-14-790-S14.pdf]

| Species                                  | 1 |   |   | 5 |   |   | 10 |   | 14 | References |       |            |                     |                                           |      |
|------------------------------------------|---|---|---|---|---|---|----|---|----|------------|-------|------------|---------------------|-------------------------------------------|------|
| <i>Vipera aspis</i>                      | Q | G | W | P | G | P | K  | V | P  | P          | [216] |            |                     |                                           |      |
| <i>Gloydius blomhoffii</i>               | Q | G | L | P | P | R | P  | K | I  | P          | P     | [215, 217] |                     |                                           |      |
| <i>Gloydius blomhoffii</i>               | Q | G | L | P | P | G | P  | P | I  | P          | P     | [215, 217] |                     |                                           |      |
| <i>Gloydius blomhoffii</i>               | Q | K | W | D | P | P | P  | V | S  | P          | P     | [215, 217] |                     |                                           |      |
| <i>Gloydius blomhoffii</i>               | Q | G | R | P | P | G | P  | P | I  | P          |       | [81]       |                     |                                           |      |
| <i>Gloydius blomhoffii</i>               | Q | G | R | P | P | G | P  | P | I  | P          | R     | [191, 217] |                     |                                           |      |
| <i>Gloydius blomhoffii</i>               | Q | G | L | P | P | G | P  | P | I  | P          | R     | [217]      |                     |                                           |      |
| <i>Gloydius halys</i>                    | Q | G | R | P | P | G | P  | P | I  | P          | P     | [82]       |                     |                                           |      |
| <i>Protobothrops flavoviridis</i>        | Q | G | R | P | R | S | E  | V | P  | P          |       | [78]       |                     |                                           |      |
| <i>Protobothrops flavoviridis</i>        | Q | S | K | P | G | R | S  | P | P  | I          | S     | P          | [78, present study] |                                           |      |
| <i>Protobothrops gramineus</i>           | Q | E | K | P | G | R | S  | P | P  | I          | S     | P          | [78]                |                                           |      |
| <i>Bothrops alternatus</i>               | Q | W | P | D | P | S | S  | D | I  | P          | P     |            | [221]               |                                           |      |
| <i>Bothrops insularis</i>                | Q | W | G | Q | H | P | N  | I | P  | P          |       |            | [79]                |                                           |      |
| <i>Bothrops insularis</i>                | Q | N | W | P | H | P | Q  | I | P  | P          |       |            | [79, 221]           |                                           |      |
| <i>Bothrops insularis</i>                | Q | L | G | P | P | P | R  | P | Q  | I          | P     | P          | [221]               |                                           |      |
| <i>Bothrops insularis</i>                | Q | L | G | P | P | R | P  | Q | I  | P          | P     |            | [79]                |                                           |      |
| <i>Bothrops insularis</i>                | Q | G | G | W | P | R | P  | G | P  | E          | I     | P          | P                   | [79, 221]                                 |      |
| <i>Bothrops insularis</i>                | Q | G | G | P | P | R | P  | Q | I  | P          | P     |            | [79]                |                                           |      |
| <i>Bothrops insularis</i>                | Q | Q | K |   |   |   |    |   |    |            |       |            | [79]                |                                           |      |
| <i>Bothrops insularis</i>                | Q | K | W |   |   |   |    |   |    |            |       |            | [79]                |                                           |      |
| <i>Bothrops insularis</i>                | Q | K | W | A | P |   |    |   |    |            |       |            | [79]                |                                           |      |
| <i>Bothrops jararaca</i>                 | Q | K | W | A | P |   |    |   |    |            |       |            | [80, 83, 213, 217]  |                                           |      |
| <i>Bothrops jararaca</i>                 | Q | W | P | R | P |   |    |   |    |            |       |            | [80]                |                                           |      |
| <i>Bothrops jararaca</i>                 | Q | S | W | P | G | P |    |   |    |            |       |            | [80, 213]           |                                           |      |
| <i>Bothrops jararaca</i>                 | Q | D | G | P | I | P | P  |   |    |            |       |            | [80]                |                                           |      |
| <i>Bothrops jararaca</i>                 | Q | W | P | R | P | T | P  | Q | I  | P          | P     |            | [80, 218]           |                                           |      |
| <i>Bothrops jararaca</i>                 | Q | W | P | R | P | Q | I  | P | P  |            |       |            | [80, 213, 218]      |                                           |      |
| <i>Bothrops jararaca</i>                 | Q | N | W | P | R | P | Q  | I | P  | P          |       |            | [80, 218, 221]      |                                           |      |
| <i>Bothrops jararaca</i>                 | Q | N | W | P | H | P | Q  | I | P  | P          |       |            | [80, 217, 218]      |                                           |      |
| <i>Bothrops jararaca</i>                 | Q | S | W | P | G | P | N  | I | P  | P          |       |            | [80, 213, 217, 218] |                                           |      |
| <i>Bothrops jararaca</i>                 | Q | G | G | W | P | R | P  | G | P  | E          | I     | P          | P                   | [80, 213, 217, 218]                       |      |
| <i>Bothrops jararaca</i>                 | Q | G | G | L | P | R | P  | G | P  | E          | I     | P          | P                   | [80, 213]                                 |      |
| <i>Bothrops jararaca</i>                 | Q | W | A | Q | W | P | R  | P | T  | P          | Q     | I          | P                   | P                                         | [80] |
| <i>Bothrops jararaca</i>                 | Q | G | R | A | P | G | P  | P | I  | P          | P     |            |                     | [80, 217]                                 |      |
| <i>Bothrops jararaca</i>                 | Q | G | R | A | P | H | P  | P | I  | P          | P     |            |                     | [80, 217]                                 |      |
| <i>Bothrops jararaca</i>                 | Q | G | W | A | W | P | R  | P | Q  | I          | P     | P          |                     | [80, 83]                                  |      |
| <i>Bothrops jararaca</i>                 | Q | G | R | P | P | G | P  | P | I  | P          | P     |            |                     | [80]                                      |      |
| <i>Bothrops jararaca</i>                 | Q | G | G | A | G | W | P  | P | I  | P          | P     |            |                     | [221]                                     |      |
| <i>Bothrops jararaca</i>                 | Q | W | G | R | P | P | G  | P | P  | I          | P     | P          |                     | [80]                                      |      |
| <i>Bothrops jararaca</i>                 | Q | W | A | Q | W | P | R  | P | Q  | I          | P     | P          |                     | [80]                                      |      |
| <i>Bothrops jararacussu</i>              | Q | G | R | P | P | G | P  | P | I  | P          | P     |            |                     | [221]                                     |      |
| <i>Bothrops jararacussu</i>              | Q | A | R | P | P | H | P  | P | I  | P          | P     |            |                     | [80,221]                                  |      |
| <i>Bothrops jararacussu</i>              | Q | N | W | P | H | P | Q  | I | P  | P          |       |            |                     | [221]                                     |      |
| <i>Bothrops jararacussu</i>              | Q | G | G | W | P | R | P  | G | P  | E          | I     | P          | P                   | [221]                                     |      |
| <i>Bothrops neuwiedi</i>                 | Q | G | G | W | P | R | P  | G | P  | E          | I     | P          | P                   | [212, 221]                                |      |
| <i>Bothrops neuwiedi</i>                 | Q | W | P | R | P | T | P  | Q | I  | P          | P     |            |                     | [221]                                     |      |
| <i>Bothrops neuwiedi</i>                 | Q | W | P | R | P | Q | I  | P | P  |            |       |            |                     | [221]                                     |      |
| <i>Agkistrodon piscivorus piscivorus</i> | Q | L | W | P | R | P | H  | I | P  | P          |       |            |                     | [211]                                     |      |
| <i>Agkistrodon bilineatus</i>            |   |   | T | P | P | A | G  | P | D  | V          | G     | P          | R                   | [222]                                     |      |
| <i>Lachesis muta</i>                     |   |   |   | W | P | P | R  | P | Q  | I          | P     | P          |                     | [220]                                     |      |
| <i>Lachesis muta</i>                     | Q | K | P | W | P | P | G  | H | H  | I          | P     | P          |                     | [220]                                     |      |
| <i>Lachesis muta</i>                     | Q | E | W | P | P | G | H  | H | I  | P          | P     |            |                     | [220]                                     |      |
| <i>Lachesis muta</i>                     | Q | K | K | W | P | P | G  | H | H  | I          | P     | P          |                     | [220]                                     |      |
| <i>Lachesis muta</i>                     | Q | K | W | D | P | P | P  | I | S  | P          | P     |            |                     | [220]                                     |      |
| <i>Lachesis muta</i>                     |   |   | T | P | P | A | G  | P | D  | V          | G     | P          | R                   | [222]                                     |      |
| <i>Crotalus adamanteus</i>               | Q | G | G | W | P | R | N  | P | I  | P          | P     |            |                     | [221]                                     |      |
| <i>Crotalus adamanteus</i>               | Q | Q | W | P | P | G | H  | H | I  | P          | P     |            |                     | [221]                                     |      |
| <i>Crotalus atrox</i>                    | Q | L | W | P | R | P | Q  | I | P  | P          |       |            |                     | [219]                                     |      |
| <i>Crotalus viridis viridis</i>          | Q | S | A | P | G | N | E  | A | I  | P          | P     |            |                     | [221]                                     |      |
| <i>Crotalus viridis viridis</i>          | Q | G | G | A | P | W | N  | P | I  | P          | P     |            |                     | [221]                                     |      |
| <i>Crotalus viridis viridis</i>          | Q | G | P | S | P | R | H  | P | I  | P          | P     |            |                     | [221]                                     |      |
| <i>Crotalus viridis viridis</i>          | Q | N | M | E | A |   |    |   |    |            |       |            |                     | Aird and Kaiser (1986, unpublished)       |      |
| <i>Crotalus viridis viridis</i>          | Q | L | W | P | R | P | H  | V | P  |            |       |            |                     | Aird and Kaiser (1986, unpublished)       |      |
| <i>Crotalus viridis viridis</i>          | Q | G | W | P | P | G | H  | H | I  | P          |       |            |                     | Aird and Kaiser (1986, unpublished)       |      |
| <i>Crotalus viridis viridis</i>          |   |   | T | P | P | A | G  | P | D  | V          | G     | P          | R                   | Aird and Kaiser (1986, unpublished), 214] |      |
| <i>Crotalus durissus collilineatus</i>   |   |   | T | P | P | A | G  | P | D  | G          | G     | P          | R                   | Higuchi et al. (2003, unpublished)        |      |
| <i>Crotalus durissus collilineatus</i>   | Q | R | W | P | H | L | E  | I | P  | P          |       |            |                     | Higuchi et al. (2003, unpublished)        |      |
| <i>Crotalus durissus collilineatus</i>   | H | R | W | P | H | P | E  | I | P  | P          |       |            |                     | Higuchi et al. (2003, unpublished)        |      |
| <i>Crotalus durissus collilineatus</i>   | Q | N | W | K | S | P |    |   |    |            |       |            |                     | Higuchi et al. (2003, unpublished)        |      |
| <i>Crotalus durissus terrificus</i>      | Q | R | W | P | H | L | E  | I | P  | P          |       |            |                     | [221]                                     |      |
