# Supplementary material for: Quantitative high-throughput profiling of snake venom gland transcriptomes and proteomes (Ovophis okinavensis and Protobothrops flavoviridis)
Source: PubMed Central journal article supplement (PMC3840601; doi:10.1186/1471-2164-14-790), 2013-11-14
Supplement: 1471-2164-14-790-S16.pdf [file 1471-2164-14-790-S16.pdf]

| Species                         | ID         | 1                                                                                                                                                                                                                                                                                                                                                                                                                                                           | 10 | 20 | 30 | 40                                                                                                                                                                                                                                                                                                                                                                                          | 50 | 60 | 70 | 80 | 90 | 100 | 110 | 120 | 130 | 140 | 150 | 160 | 170 | 180 | 190 | 200 | 210 | 220 |
|---------------------------------|------------|-------------------------------------------------------------------------------------------------------------------------------------------------------------------------------------------------------------------------------------------------------------------------------------------------------------------------------------------------------------------------------------------------------------------------------------------------------------|----|----|----|---------------------------------------------------------------------------------------------------------------------------------------------------------------------------------------------------------------------------------------------------------------------------------------------------------------------------------------------------------------------------------------------|----|----|----|----|----|-----|-----|-----|-----|-----|-----|-----|-----|-----|-----|-----|-----|-----|
| <i>Pseudechis australis</i>     | ABW74876.1 |                                                                                                                                                                                                                                                                                                                                                                                                                                                             |    |    |    | M L L F T L C F F A D L E N G G K A L A S P P G K W K K A N V R F D S N T A F E S L V V S P D K K T V E N V G V P Q V V P D N P E R F S S S P C V L G S P G F R S G R H F F E V K Y G T Q R E W A V G L A G K S V K R K G Y L R L V P E E L I W Q R G L W L L R R L E T D S D K L Q K G S G K I V V F L D Y S E G K V I F D Q D G E V T T V Q A N F N G E E V V P F Y Y L G G G V S L T N L |    |    |    |    |    |     |     |     |     |     |     |     |     |     |     |     |     |     |
| <i>Ophiophagus hannah</i>       | P83234.2   |                                                                                                                                                                                                                                                                                                                                                                                                                                                             |    |    |    | M L L F T L C F F A D Q E N G G K A L A S P P G N W Q K A D V T F D S N T A F E S L V V S P D K K T V E N V G V P K G V P D S P E R F S S S P C V L G S P G F R S G K H F F E V K Y G T Q R E W A V G L A G K S V K R K G Y L R L V P E E R I W Q K G L W W L R R L E T D S D K L Q K G S G K I I V F L D Y D E G K V I F D L D G E V T T I Q A N F N G E E V V P F Y Y I G A R V S L A N L |    |    |    |    |    |     |     |     |     |     |     |     |     |     |     |     |     |     |
| <i>Crotalus adamanteus</i>      | AFJ49267.1 | M S P S A G L Q F S L Y F L Q T K K V L W K L T D K E K G L C Y I L L F T L C F F A D Q E N G G K A L A S P P G I W K R A D V T F D S N T A F S S L V V S A N K K T V K N V G V P Q V V P D N P E R F N S S P C V L G S P G F R S G K H Y F E V K Y G T Q R E W A V G I A G K S V K R K G N L M L V P E E R I W Q M G L W W L R H L E T D P G R V H S T S G K I T V F V D Y N G G N V I F D L N R I N T T L K A N F N G E E V V P F F Y L G G T V S L T T L |    |    |    |                                                                                                                                                                                                                                                                                                                                                                                             |    |    |    |    |    |     |     |     |     |     |     |     |     |     |     |     |     |     |
| <i>Lachesis muta</i>            | Q27J48.1   | M S P S A G F Q F S L Y F L Q T K K V L W K L T - - - - G L C Y I L L F T L C F F A D Q E N G G K A L A S P P G I W K R A D V T F D S N T A F S S L V V S A N K K T V K N V G V P Q V V P D N P E R F N S S P C V L G S P G F R S G K H Y F E V K Y G T Q R E W A V G L A G K S V K R K G N L N L V P E E R I W Q T G L W W L R H L E T D P G R V H S T S G K I T V F V D Y S G G N V I F D L N R I I T I L K A N F S G E E V V P F F Y L G G T V S L T T L |    |    |    |                                                                                                                                                                                                                                                                                                                                                                                             |    |    |    |    |    |     |     |     |     |     |     |     |     |     |     |     |     |     |
| <i>Protothrops flavoviridis</i> | AB851949   | M S P S A G F Q F S L N F L Q T K K V L W K L T - - - - G L C Y I L L F T L C F F A D Q K N G G K A L V L P P G I W K K A D V T F D S N T A F S S L                                                                                                                                                                                                                                                                                                         |    |    |    |                                                                                                                                                                                                                                                                                                                                                                                             |    |    |    |    |    |     |     |     |     |     |     |     |     |     |     |     |     |     |
