# Supplementary material for: Quantitative high-throughput profiling of snake venom gland transcriptomes and proteomes (Ovophis okinavensis and Protobothrops flavoviridis)
Source: BMC Genomics. 2013 Nov 14;14:790. doi: 10.1186/1471-2164-14-790 (PMC3840601; doi:10.1186/1471-2164-14-790)
Supplement: Additional file 12: Figure S5 — Alignment of 26 Ovophis okinavensis serine protease sequences. It is impossible to infer biological activities from these transcripts; however, the Ovophis transcripts seem to fall into three or four structural subclasses or groupings. SP15 and related sequences with clusters of three acidic residues (positions 121-123) and three aromatic residues (position 132-134) appear most similar to thrombin-like enzymes. SP05 and 06 all display a high percentage of aliphatic and aromatic residues (positions 116-140), but their biological activity is not known. SP08 is apparently a thrombin-like enzyme. SP09 is most similar, based on this fragment, to an SP from Protobothrops jerdonii venom that has lost two of the three catalytic residues of active SPs. [file 1471-2164-14-790-S12.pdf]

| Name  | ID       | 1                                                                                                                                                                                                                                                   | 10 | 20                                                                                                                                                                                                                  | 30                                                                                                                                                                                    | 40                                                                                                                                                                                                            | 50 | 60 | 70                                                                                                                                                                        | 80                                                                                                                                                                                                    | 90                                                                                                                                        | 100                                                                                                                                                       | 110 | 120                                                                                                                                                                                 | 130 | 140                                                 | 150 | 160 | 170 | 180 | 190 |
|-------|----------|-----------------------------------------------------------------------------------------------------------------------------------------------------------------------------------------------------------------------------------------------------|----|---------------------------------------------------------------------------------------------------------------------------------------------------------------------------------------------------------------------|---------------------------------------------------------------------------------------------------------------------------------------------------------------------------------------|---------------------------------------------------------------------------------------------------------------------------------------------------------------------------------------------------------------|----|----|---------------------------------------------------------------------------------------------------------------------------------------------------------------------------|-------------------------------------------------------------------------------------------------------------------------------------------------------------------------------------------------------|-------------------------------------------------------------------------------------------------------------------------------------------|-----------------------------------------------------------------------------------------------------------------------------------------------------------|-----|-------------------------------------------------------------------------------------------------------------------------------------------------------------------------------------|-----|-----------------------------------------------------|-----|-----|-----|-----|-----|
| SP 01 | AB848260 |                                                                                                                                                                                                                                                     |    |                                                                                                                                                                                                                     |                                                                                                                                                                                       |                                                                                                                                                                                                               |    |    |                                                                                                                                                                           |                                                                                                                                                                                                       |                                                                                                                                           |                                                                                                                                                           |     | F Q G I V S W G P T P C A Q P R K P A L Y S K V F D H L D W I Q S I I A G N T T V T C P H E N L *                                                                                   |     |                                                     |     |     |     |     |     |
| SP 03 | AB852016 |                                                                                                                                                                                                                                                     |    |                                                                                                                                                                                                                     |                                                                                                                                                                                       |                                                                                                                                                                                                               |    |    |                                                                                                                                                                           |                                                                                                                                                                                                       |                                                                                                                                           |                                                                                                                                                           |     |                                                                                                                                                                                     |     | Y T K V F D Y N D W I Q N I I A G N T T A T C P P * |     |     |     |     |     |
| SP 09 | AB848264 |                                                                                                                                                                                                                                                     |    |                                                                                                                                                                                                                     |                                                                                                                                                                                       |                                                                                                                                                                                                               |    |    |                                                                                                                                                                           |                                                                                                                                                                                                       | E G G I - - - D T C A G D S G G P L I C N G Q F Q G I V S W G G D P C A Q P H E P G V Y T N V F D H L D W I Q S I I A G N T D A T C P L * |                                                                                                                                                           |     |                                                                                                                                                                                     |     |                                                     |     |     |     |     |     |
| SP 07 | AB851969 |                                                                                                                                                                                                                                                     |    |                                                                                                                                                                                                                     |                                                                                                                                                                                       |                                                                                                                                                                                                               |    |    |                                                                                                                                                                           |                                                                                                                                                                                                       |                                                                                                                                           |                                                                                                                                                           |     | V Q G I V H G G G K T C G Q P H V P G L Y I K V F D Y I D W I Q S I I A G N T T A T C P P *                                                                                         |     |                                                     |     |     |     |     |     |
| SP 02 | AB848261 | D R P I S N S A H I A P L S L P S S P P S V G S V C R V M G W G T I T S P N V I L P D V P R C A N I N L L N Y S V C R A A Y P E L P A K S R T L C A G                                                                                               |    |                                                                                                                                                                                                                     |                                                                                                                                                                                       |                                                                                                                                                                                                               |    |    |                                                                                                                                                                           |                                                                                                                                                                                                       |                                                                                                                                           |                                                                                                                                                           |     |                                                                                                                                                                                     |     |                                                     |     |     |     |     |     |
| SP 10 | AB848255 | P L S L P S S P P S V G S V C R V M G W G T I T S P N E T L P D V P R C A N I N L L N Y T V C R R V F P E L P A T S R I L C A G V L E G G I                                                                                                         |    |                                                                                                                                                                                                                     |                                                                                                                                                                                       |                                                                                                                                                                                                               |    |    |                                                                                                                                                                           |                                                                                                                                                                                                       |                                                                                                                                           | D T C K R D S G G P L I C N G Q                                                                                                                           |     |                                                                                                                                                                                     |     |                                                     |     |     |     |     |     |
| SP 04 | AB848265 |                                                                                                                                                                                                                                                     |    |                                                                                                                                                                                                                     |                                                                                                                                                                                       |                                                                                                                                                                                                               |    |    |                                                                                                                                                                           | N Y T V C R R V F P E L P A T S R I L C A G V L Q G G K - - - D T C R G D S G G P L I C N G Q V Q G I V H G G G K T C G Q P H V P G L Y I K V F D Y                                                   |                                                                                                                                           |                                                                                                                                                           |     |                                                                                                                                                                                     |     |                                                     |     |     |     |     |     |
| SP 05 | AB848250 |                                                                                                                                                                                                                                                     |    |                                                                                                                                                                                                                     |                                                                                                                                                                                       | I M G W G T I I S P D V S Y P D V P H C A N I R L L R Y S L C R A V Y L G L P A Q S R I L C A G V L Q G G K - - - D T C R G D S G G P L I C N G Q V Q G I V H G G G K T C G Q P H V P G L Y I K V F D Y       |    |    |                                                                                                                                                                           |                                                                                                                                                                                                       |                                                                                                                                           |                                                                                                                                                           |     |                                                                                                                                                                                     |     |                                                     |     |     |     |     |     |
| SP 06 | AB848247 |                                                                                                                                                                                                                                                     |    | V G S V C R I M G W G A I T S P N A T Y P D V P H C A N I R L L R Y S L C R A V Y L G L P A Q S R I L C A G V L Q G G K - - - D T C R G D S G G P L I C N G Q V Q G I V H G G G K T C G Q P H V P G L Y I K V F D Y |                                                                                                                                                                                       |                                                                                                                                                                                                               |    |    |                                                                                                                                                                           |                                                                                                                                                                                                       |                                                                                                                                           |                                                                                                                                                           |     |                                                                                                                                                                                     |     |                                                     |     |     |     |     |     |
| SP 08 | AB848257 |                                                                                                                                                                                                                                                     |    |                                                                                                                                                                                                                     |                                                                                                                                                                                       |                                                                                                                                                                                                               |    |    | D V P H C A N I N L L D H A V C Q A A Y P W W Q V A S T T L C A G I L K G G K - - - D T C R G D S G G P L I C N G Q V Q G I V H G G G K T C G Q P H V P G L Y I K V F D Y |                                                                                                                                                                                                       |                                                                                                                                           |                                                                                                                                                           |     |                                                                                                                                                                                     |     |                                                     |     |     |     |     |     |
| SP 11 | AB848252 |                                                                                                                                                                                                                                                     |    |                                                                                                                                                                                                                     |                                                                                                                                                                                       | Q K S S E L V V G G D E C N I N E H R S - - - L V A I F N - - S T G F - - L C G G T L I N Q E W V V T A A H C D S D N L Q M Q F G V H S K K I L N E D E Q T R D P K E K F I C P N R K K D D E K D K D I M L I |    |    |                                                                                                                                                                           |                                                                                                                                                                                                       |                                                                                                                                           |                                                                                                                                                           |     |                                                                                                                                                                                     |     |                                                     |     |     |     |     |     |
| SP 12 | AB848263 |                                                                                                                                                                                                                                                     |    |                                                                                                                                                                                                                     |                                                                                                                                                                                       |                                                                                                                                                                                                               |    |    |                                                                                                                                                                           |                                                                                                                                                                                                       |                                                                                                                                           | A A H C D S N N F Q M L F G V H S K K I L N E D E Q T R D P K E K F I C P N R K K D D E K D K D I M L I R L N S P V S N S E H I T P L S L P S S P P       |     |                                                                                                                                                                                     |     |                                                     |     |     |     |     |     |
| SP 14 | AB848249 | M I R V L A N L L I L Q L S Y A Q K S S E L V I G G D E C N I N E H R F - - - L A A L Y D V W S G D F - - L C G G T L I H P E W V L T A A H C                                                                                                       |    |                                                                                                                                                                                                                     |                                                                                                                                                                                       |                                                                                                                                                                                                               |    |    |                                                                                                                                                                           |                                                                                                                                                                                                       |                                                                                                                                           | D R Y R L S I K L G M H N K N V Q F D D E Q S R Y P K K K Y F F R C                                                                                       |     |                                                                                                                                                                                     |     |                                                     |     |     |     |     |     |
| SP 15 | AB848266 |                                                                                                                                                                                                                                                     |    |                                                                                                                                                                                                                     |                                                                                                                                                                                       |                                                                                                                                                                                                               |    |    |                                                                                                                                                                           |                                                                                                                                                                                                       |                                                                                                                                           | D R Y R L S I K L G M H N K N V Q F D D E Q S R Y P K K K Y F F R C R N N F T K W D K D V M L I R L N R P V R N S E H I T P L S L P S S P P               |     |                                                                                                                                                                                     |     |                                                     |     |     |     |     |     |
| SP 16 | AB848251 |                                                                                                                                                                                                                                                     |    |                                                                                                                                                                                                                     |                                                                                                                                                                                       |                                                                                                                                                                                                               |    |    |                                                                                                                                                                           | M Y D V W S G D F - - L C G G T L I H P E W V L T A A H C K T K N M F I Y F G I H N K S V Q F D D E Q R R Y P K K K Y F F R C H N N F T K W D K D V M L I R L N R P V R N S E H I T P L S L P S S P P |                                                                                                                                           |                                                                                                                                                           |     |                                                                                                                                                                                     |     |                                                     |     |     |     |     |     |
| SP 17 | AB848258 |                                                                                                                                                                                                                                                     |    |                                                                                                                                                                                                                     |                                                                                                                                                                                       |                                                                                                                                                                                                               |    |    |                                                                                                                                                                           |                                                                                                                                                                                                       |                                                                                                                                           | C G G T L I H P E W V L T A A H C K T K N M F I Y F G I H N K S V Q F D D E Q R R Y P K K K Y F F R C H N N F T K W D K D V M L I R L N R P V R N S T H I |     |                                                                                                                                                                                     |     |                                                     |     |     |     |     |     |
| SP 25 | AB848262 |                                                                                                                                                                                                                                                     |    |                                                                                                                                                                                                                     |                                                                                                                                                                                       |                                                                                                                                                                                                               |    |    |                                                                                                                                                                           |                                                                                                                                                                                                       |                                                                                                                                           | A A H C D R T N I Q I K L G V H S K N V P N E D E Q T R V P K E K F F C L S S K T Y T K W D K D I M L I R L N S P V S N S E H I T P L S L P S S P P       |     |                                                                                                                                                                                     |     |                                                     |     |     |     |     |     |
| SP 13 | AB848259 |                                                                                                                                                                                                                                                     |    |                                                                                                                                                                                                                     |                                                                                                                                                                                       |                                                                                                                                                                                                               |    |    |                                                                                                                                                                           |                                                                                                                                                                                                       |                                                                                                                                           | C G G T L I H P E W V L T A A H C N R T N M R I L L G V H S A S V Q N D D K Q A R V P E E K Y F C L S S N N D T K L D K D I M L I K L N R P V R N S T H I |     |                                                                                                                                                                                     |     |                                                     |     |     |     |     |     |
| SP 23 | AB851970 |                                                                                                                                                                                                                                                     |    |                                                                                                                                                                                                                     | M I R V L A N L L I L Q L S Y A Q K S S E L I I G G D E C N I N E H R F - - - L V A L Y K - - S T R F - - L C G G T L I N Q E W V L S A A H C D R T N I R I K L G M H S K T V P N E D |                                                                                                                                                                                                               |    |    |                                                                                                                                                                           |                                                                                                                                                                                                       |                                                                                                                                           |                                                                                                                                                           |     |                                                                                                                                                                                     |     |                                                     |     |     |     |     |     |
| SP 24 | AB851971 |                                                                                                                                                                                                                                                     |    |                                                                                                                                                                                                                     | L Q L S Y A Q T S S E L I I G G D E C N I N E H R F - - - L V A L Y K - - S T R F - - L C G G T L I N Q E W V L S A A H C D R T N I R I K L G M H S K T V P N E D                     |                                                                                                                                                                                                               |    |    |                                                                                                                                                                           |                                                                                                                                                                                                       |                                                                                                                                           |                                                                                                                                                           |     |                                                                                                                                                                                     |     |                                                     |     |     |     |     |     |
| SP 19 | AB848254 |                                                                                                                                                                                                                                                     |    |                                                                                                                                                                                                                     |                                                                                                                                                                                       |                                                                                                                                                                                                               |    |    |                                                                                                                                                                           |                                                                                                                                                                                                       |                                                                                                                                           |                                                                                                                                                           |     | N C E R K N I R M K F G M H S T N V T N K D S Q T R V P K E K F F C L S S K T Y T K W N K D I M L I R L K R P V S N S E H I A P L S L P S N P P S V G S V C R V M G W G T I S P T K |     |                                                     |     |     |     |     |     |
| SP 18 | AB848253 |                                                                                                                                                                                                                                                     |    |                                                                                                                                                                                                                     |                                                                                                                                                                                       | E A M V L I R V L A N L L I L Q L S Y A Q K S S E L V V G G D E C N I N E H R F - - L A A L S Y P T - S K D F - - I C G G T L I H P E W V L T A A N C E R K N I R M K F G M H S T N V T N K D S               |    |    |                                                                                                                                                                           |                                                                                                                                                                                                       |                                                                                                                                           |                                                                                                                                                           |     |                                                                                                                                                                                     |     |                                                     |     |     |     |     |     |
| SP 20 | AB848246 | Y L I R L I Q Y L K F K F G T G I L Q A N S F P R R V E A M V L I R V L A N L L M L Q L S Y A Q T S S E L I I G G D E C N T N E H R F - - - L V L V Y - - - Y D G Y - - Q C S G T L I N E E W V L T A A H C D G K K M K L Q F G L H S L K V P N K D |    |                                                                                                                                                                                                                     |                                                                                                                                                                                       |                                                                                                                                                                                                               |    |    |                                                                                                                                                                           |                                                                                                                                                                                                       |                                                                                                                                           |                                                                                                                                                           |     |                                                                                                                                                                                     |     |                                                     |     |     |     |     |     |
| SP 22 | AB848268 |                                                                                                                                                                                                                                                     |    |                                                                                                                                                                                                                     |                                                                                                                                                                                       |                                                                                                                                                                                                               |    |    |                                                                                                                                                                           |                                                                                                                                                                                                       |                                                                                                                                           |                                                                                                                                                           |     |                                                                                                                                                                                     |     |                                                     |     |     |     |     |     |
| SP 21 | AB848248 |                                                                                                                                                                                                                                                     |    |                                                                                                                                                                                                                     |                                                                                                                                                                                       |                                                                                                                                                                                                               |    |    |                                                                                                                                                                           |                                                                                                                                                                                                       |                                                                                                                                           |                                                                                                                                                           |     |                                                                                                                                                                                     |     |                                                     |     |     |     |     |     |
