# Supplementary material for: Quantitative high-throughput profiling of snake venom gland transcriptomes and proteomes (Ovophis okinavensis and Protobothrops flavoviridis)
Source: BMC Genomics. 2013 Nov 14;14:790. doi: 10.1186/1471-2164-14-790 (PMC3840601; doi:10.1186/1471-2164-14-790)
Supplement: Additional file 15: Figure S8 — Alignment of Protobothrops flavoviridis [AB851922] and Ovophis okinavensis [AB848286] dipeptidyl peptidase IV sequences with two isomers from Gloydius brevicaudus venom. The former sequences each possess a leucine residue in position 268 that is missing in the Gloydius sequences. They also have Gly-80 where Gloydius has Glu, Ile-85/Val, Asn-113/Ser, Thr-170/Ala, Ser-215/Arg, Ala-395/Ser, Arg-502/Ser, Gly-632/Asp, and Glu-680/Lys. The Protobothrops sequence lacks asparagine-133, which is present in the other three. Each of the Okinawan species has accumulated several point mutations: Protobothrops (Phe-73, Val-248, Ser-272, Leu-304, Thr-324, Asp-485,) and Ovophis (Val-73, Ile-144, Thr-176, Thr-220, Thr-396, Val-473, Glu-559, Asn-577). [file 1471-2164-14-790-S15.pdf]

| Species                          | Name       | ID       | 1 | 10 | 20 | 30 | 40 | 50 | 60 | 70 | 80 | 90 | 100 | 110 | 120 | 130 | 140 | 150 | 160 | 170 | 180 | 190 | 200 | 210 | 220 | 230 | 240 | 250 |   |   |   |   |   |   |   |   |   |   |   |   |   |   |   |   |   |   |   |   |   |   |   |   |   |   |   |   |   |   |   |   |   |   |   |   |   |   |   |   |   |   |   |   |   |   |   |   |   |   |   |   |   |   |   |   |   |   |   |   |   |   |   |   |   |   |   |   |   |   |   |   |   |   |   |   |   |   |   |   |   |   |   |   |   |   |   |   |   |   |   |   |   |   |   |   |   |   |   |   |   |   |   |   |   |   |   |   |   |   |   |   |   |   |   |   |   |   |   |   |   |   |   |   |   |   |   |   |   |   |   |   |   |   |   |   |   |   |   |   |   |   |   |   |   |   |   |   |   |   |   |   |   |   |   |   |   |   |   |   |   |   |   |   |   |   |   |   |   |   |   |   |   |   |   |   |   |   |   |   |   |   |   |   |   |   |   |   |   |   |   |   |   |   |   |   |   |   |   |   |   |   |   |   |   |   |   |   |   |   |   |   |   |   |   |   |   |   |   |   |   |   |   |   |
|----------------------------------|------------|----------|---|----|----|----|----|----|----|----|----|----|-----|-----|-----|-----|-----|-----|-----|-----|-----|-----|-----|-----|-----|-----|-----|-----|---|---|---|---|---|---|---|---|---|---|---|---|---|---|---|---|---|---|---|---|---|---|---|---|---|---|---|---|---|---|---|---|---|---|---|---|---|---|---|---|---|---|---|---|---|---|---|---|---|---|---|---|---|---|---|---|---|---|---|---|---|---|---|---|---|---|---|---|---|---|---|---|---|---|---|---|---|---|---|---|---|---|---|---|---|---|---|---|---|---|---|---|---|---|---|---|---|---|---|---|---|---|---|---|---|---|---|---|---|---|---|---|---|---|---|---|---|---|---|---|---|---|---|---|---|---|---|---|---|---|---|---|---|---|---|---|---|---|---|---|---|---|---|---|---|---|---|---|---|---|---|---|---|---|---|---|---|---|---|---|---|---|---|---|---|---|---|---|---|---|---|---|---|---|---|---|---|---|---|---|---|---|---|---|---|---|---|---|---|---|---|---|---|---|---|---|---|---|---|---|---|---|---|---|---|---|---|---|---|---|---|---|---|---|---|---|---|---|---|---|---|---|---|---|
| <i>Protothorops flavoviridis</i> | Pf DPP IV  | AB851922 | M | K  | T  | I  | V  | K  | C  | L  | L  | G  | L   | L   | A   | L   | G   | V   | I   | I   | T   | A   | I   | V   | V   | P   | V   | V   | L | L | T | R | D | D | S | D | I | R | R | K | F | S | L | E | D | Y | L | T | D | E | F | Q | Y | K | S | Y | N | L | R | W | M | S | G | H | E | Y | V | Y | T | N | Q | N | N | V | F | L | Y | N | I | D | D | G | R | E | S | I | I | L | S | N | D | T | L | D | S | F | N | S | S | Q | A | I | L | S | P | D | R | K | F | A | L | L | Q | Y | N | Y | E | K | V | W | R | H | S | Y | T | A | S | Y | H | I | Y | D | L | N | - | R | T | K | I | T | E | N | P | L | P | T | N | I | Q | Y | I | S | W | S | P | V | G | H | K | L | A | Y | V | Y | R | N | N | V | Y | V | K | T | T | P | N | A | S | P | V | Q | I | T | E | N | G | A | E | N | K | I | L | N | G | L | A | D | W | V | Y | E | E | E | M | F | G | T | H | S | A | L | W | W | S | P | N | G | S | F | L | A | F | A | E | I | N | D | T | E | V | P | V | M | E | Y | S | F | Y | S | E | D | T | L | Q | Y | P | K | T | I | K | V | P | Y |
| <i>Ovophis okinavensis</i>       | Oo DPP IV  | AB848286 | M | K  | T  | I  | V  | K  | C  | L  | L  | G  | L   | L   | A   | L   | G   | V   | I   | I   | T   | A   | I   | V   | V   | P   | V   | V   | L | L | T | R | D | D | S | D | I | R | R | K | F | S | L | E | D | Y | L | T | D | E | F | Q | Y | K | S | Y | N | L | R | W | M | S | G | H | E | Y | V | Y | T | N | Q | N | N | V | V | L | Y | N | I | D | D | G | R | E | S | I | I | L | S | N | D | T | L | D | S | F | N | S | S | Q | A | I | L | S | P | D | R | K | F | A | L | L | Q | Y | N | Y | E | K | V | W | R | H | S | Y | T | A | S | Y | H | I | Y | D | L | N | N | R | T | K | I | T | E | N | P | L | P | I | N | I | Q | Y | I | S | W | S | P | V | G | H | K | L | A | Y | V | Y | R | N | N | V | Y | V | K | T | T | P | N | A | S | T | V | Q | I | T | D | N | G | A | E | N | K | I | L | N | G | L | A | D | W | V | Y | E | E | E | M | F | G | T | H | S | A | L | W | W | S | P | N | G | S | F | L | A | F | T | E | I | N | D | T | E | V | P | V | M | E | Y | S | F | Y | S | E | D | T | L | Q | Y | P | K | T | I | K | I | P | Y |
| <i>Gloydus brevicaudus</i>       | Gb DPP IVa | BAD06332 | M | K  | T  | V  | V  | K  | C  | L  | L  | G  | L   | L   | A   | L   | G   | V   | I   | I   | T   | A   | I   | V   | V   | P   | V   | V   | L | L | T | R | D | D | S | D | I | R | R | K | F | S | L | E | D | Y | L | S | D | E | F | Q | Y | K | S | Y | N | L | R | W | M | S | G | H | E | Y | V | Y | T | N | Q | N | N | V | L | L | Y | N | I | D | D | E | R | E | S | I | V | L | S | N | D | T | L | D | S | F | N | S | S | Q | A | I | L | S | P | D | R | K | F | A | L | L | Q | Y | S | Y | E | K | V | W | R | H | S | Y | T | A | S | Y | H | I | Y | D | L | N | N | R | T | K | I | T | E | N | P | L | P | T | N | I | Q | Y | I | S | W | S | P | V | G | H | K | L | A | Y | V | Y | R | N | N | V | Y | V | K | A | T | P | N | A | S | P | V | Q | I | T | E | N | G | A | E | N | K | I | L | N | G | L | A | D | W | V | Y | E | E | E | M | F | G | T | H | S | A | L | W | W | S | P | N | G | R | F | L | A | F | A | E | I | N | D | T | E | V | P | V | M | E | Y | S | F | Y | S | E | D | T | L | Q | Y | P | K | T | I | K | I | P | Y |
| <i>Gloydus brevicaudus</i>       | Gb DPP IVb | BAD06333 | M | K  | T  | V  | V  | K  | C  | L  | L  | G  | L   | L   | A   | L   | G   | V   | I   | I   | T   | A   | I   | V   | V   | P   | V   | V   | L | L | T | R | D | D | S | D | I | R | R | K | F | S | L | E | D | Y | L | S | D | E | F | Q | Y | K | S | Y | N | L | R | W | M | S | G | H | E | Y | V | Y | T | N | Q | N | N | V | L | L | Y | N | I | D | D | E | R | E | S | I | V | L | S | N | D | T | L | D | S | F | N | S | S | Q | A | I | L | S | P | D | R | K | F | A | L | L | Q | Y | S | Y | E | K | V | W | R | H | S | Y | T | A | S | Y | H | I | Y | D | L | N | N | R | T | K | I | T | E | N | P | L | P | T | N | I | Q | Y | I | S | W | S | P | V | G | H | K | L | A | Y | V | Y | R | N | N | V | Y | V | K | A | T | P | N | A | S | P | V | Q | I | T | E | N | G | A | E | N | K | I | L | N | G | L | A | D | W | V | Y | E | E | E | M | F | G | T | H | S | A | L | W | W | S | P | N | G | R | F | L | A | F | A | E | I | N | D | T | E | V | P | V | M | E | Y | S | F | Y | S | E | D | T | L | Q | Y | P | K | T | I | K | I | P | Y |
| <i>Protothorops flavoviridis</i> | Pf DPP IV  | AB851922 | P | K  | A  | G  | A  | R  | N  | P  | T  | I  | R   | L   | F   | V   | L   | D   | I   | L   | S   | L   | S   | S   | K   | N   | I   | S   | E | I | V | A | P | S | S | I | I | S | G | D | H | Y | L | S | A | V | T | W | V | T | D | E | R | I | C | L | Q | W | L | R | R | I | Q | N | Y | S | V | L | T | I | C | D | Y | S | G | T | W | H | C | P | K | E | R | E | H | L | E | E | S | K | T | G | W | V | G | R | F | Q | P | S | E | P | Y | F | T | S | D | K | I | S | Y | Y | R | I | I | S | D | S | E | G | Y | K | H | I | H | Y | T | D | S | A | G | K | V | K | P | I | T | S | G | K | W | E | V | I | S | I | A | A | V | T | N | N | S | L | Y | F | I | S | N | E | F | E | G | R | P | G | G | R | H | L | Y | K | V | D | L | K | N | D | L | K | K | I | C | I | T | C | N | S | K | E | E | A | C | Q | Y | F | S | V | S | F | S | T | D | S | R | Y | Y | K | L | N | C | Y | G | P | D | L | P | Y | F | T | L | Q | N | S | I | T | D | K | A | I | K | T | L | E | D | N | D | N | L | K | N | V | L | K | E | I | Q | M | P | C | K | R |
| <i>Ovophis okinavensis</i>       | Oo DPP IV  | AB848286 | P | K  | A  | G  | A  | I  | N  | P  | T  | I  | R   | L   | F   | V   | L   | D   | I   | L   | S   | L   | S   | P   | K   | N   | I   | S   | E | I | V | A | P | S | S | I | I | S | G | D | H | Y | L | S | A | V | T | W | V | T | D | E | R | I | C | V | Q | W | L | R | R | I | Q | N | Y | S | V | L | T | I | C | D | Y | S | G | A | W | H | C | P | K | E | R | E | H | L | E | E | S | K | T | G | W | V | G | R | F | Q | P | S | E | P | Y | F | T | S | D | E | I | S | Y | Y | R | I | I | S | D | S | E | G | Y | K | H | I | H | Y | I | D | S | A | G | K | V | K | P | I | T | S | G | K | W | E | V | I | S | I | A | T | V | T | N | N | S | L | Y | F | I | S | N | E | F | E | G | R | P | G | G | R | H | L | Y | K | V | D | L | K | N | D | L | K | K | I | C | I | T | C | N | S | K | E | E | A | C | Q | Y | F | S | V | S | F | S | T | D | S | R | Y | Y | K | L | N | C | Y | G | P | D | L | P | Y | F | T | L | Q | N | S | V | T | D | K | A | I | K | T | L | E | D | N | N | N | L | K | N | V | L | K | D | I | Q | M | P | C | K | R |
| <i>Gloydus brevicaudus</i>       | Gb DPP IVa | BAD06332 | P | K  | A  | G  | A  | I  | N  | P  | T  | I  | R   | L   | F   | V   | L   | D   | I   | -   | S   | L   | S   | P   | K   | N   | I   | S   | E | I | V | A | P | S | S | I | I | S | G | D | H | Y | L | S | A | V | T | W | V | T | D | E | R | I | C | V | Q | W | L | R | R | I | Q | N | Y | S | V | L | T | I | C | D | Y | S | G | A | W | H | C | P | K | E | R | E | H | L | E | E | S | K | T | G | W | V | G | R | F | Q | P | S | E | P | Y | F | T | S | D | K | I | S | Y | Y | R | I | I | S | D | S | E | G | Y | K | H | I | H | Y | T | D | S | A | G | K | V | K | P | I | T | S | G | K | W | E | V | I | S | I | S | A | V | T | N | N | S | L | Y | F | I | S | N | E | F | E | G | R | P | G | G | R | H | L | Y | K | V | D | L | K | N | D | L | K | K | I | C | I | T | C | N | S | K | E | E | A | C | Q | Y | F | S | V | S | F | S | T | D | S | R | Y | Y | K | L | N | C | Y | G | P | D | L | P | Y | F | T | L | Q | N | S | I | T | D | K | A | I | K | T | L | E | D | N | N | N | L | K | N | V | L | K | E | I | Q | M | P | C | K | R |
| <i>Gloydus brevicaudus</i>       | Gb DPP IVb | BAD06333 | P | K  | A  | G  | A  | I  | N  | P  | T  | I  | R   | L   | F   | V   | L   | D   | I   | -   | S   | L   | S   | P   | K   | N   | I   | S   | E | I | V | A | P | S | S | I | I | S | G | D | H | Y | L | S | V | V | T | W | V | T | D | E | R | I | C | V | Q | W | L | R | R | I | Q | N | Y | S | V | L | T | I | C | D | Y | S | G | A | W | H | C | P | K | E | R | E | H | L | E | E | S | K | T | G | W | V | G | R | F | Q | P | S | E | P | Y | F | T | S | D | K | I | S | Y | Y | R | I | I | S | D | S | E | G | Y | K | H | I | H | Y | T | D | S | A | G | K | V | K | P | I | T | S | G | K | W | E | V | I | S | I | S | A | V | T | N | N | S | L | Y | F | I | S | N | E | F | E | G | R | P | G | G | R | H | L | Y | K | V | D | L | K | N | D | L | K | K | I | C | I | T | C | N | S | K | E | E | A | C | Q | Y | F | S | V | S | F | S | T | D | S | R | Y | Y | K | L | N | C | Y | G | P | D | L | P | Y | F | T | L | Q | N | S | I | T | D | K | A | I | K | T | L | E | D | N | N | N | L | K | N | V | L | K | E | I | Q | M | P | C | K | R |
| <i>Protothorops flavoviridis</i> | Pf DPP IV  | AB851922 | L | R  | N  | I  | T  | L  | H  | G  | Q  | T  | Y   | W   | Y   | Q   | M   | I   | L   | P   | P   | N   | F   | D   | E   | S   | K   | K   | Y | P | L | L | I | D | V | Y | A | G | P | C | S | Q | K | A | D | A | A | F | R | I | N | W | S | T | Y | L | A | S | S | E | G | I | I | V | A | S | F | D | G | R | G | S | G | F | Q | G | D | K | I | L | H | A | I | Y | R | R | L | G | T | Y | E | V | E | D | Q | I | S | A | A | K | L | F | S | E | M | S | F | V | D | K | D | R | I | A | I | W | G | W | S | Y | G | G | Y | V | T | S | M | V | L | G | A | G | S | G | V | F | K | C | G | I | A | V | A | P | V | S | R | W | Q | Y | Y | D | S | I | Y | T | E | R | Y | M | G | L | P | E | K | N | D | N | L | N | F | Y | E | N | S | T | V | M | A | R | A | E | N | F | R | T | V | D | Y | L | L | I | H | G | T | A | D | D | N | V | H | F | Q | Q | A | A | Q | I | S | K | A | L | V | D | A | E | V | D | F | Q | A | M | W | Y | T | D | K | D | H | G | I | G | G | H | A | H | S | H | I | Y | Q | H | M | S | H | F | M | K | Q | C | F | K |
| <i>Ovophis okinavensis</i>       | Oo DPP IV  | AB848286 | L | R  | N  | I  | T  | L  | H  | G  | Q  | T  | Y   | W   | Y   | Q   | M   | I   | L   | P   | P   | N   | F   | D   | E   | S   | K   | K   | Y | P | L | L | I | D | V | Y | A | G | P | C | S | Q | K | A | D |   |   |   |   |   |   |   |   |   |   |   |   |   |   |   |   |   |   |   |   |   |   |   |   |   |   |   |   |   |   |   |   |   |   |   |   |   |   |   |   |   |   |   |   |   |   |   |   |   |   |   |   |   |   |   |   |   |   |   |   |   |   |   |   |   |   |   |   |   |   |   |   |   |   |   |   |   |   |   |   |   |   |   |   |   |   |   |   |   |   |   |   |   |   |   |   |   |   |   |   |   |   |   |   |   |   |   |   |   |   |   |   |   |   |   |   |   |   |   |   |   |   |   |   |   |   |   |   |   |   |   |   |   |   |   |   |   |   |   |   |   |   |   |   |   |   |   |   |   |   |   |   |   |   |   |   |   |   |   |   |   |   |   |   |   |   |   |   |   |   |   |   |   |   |   |   |   |   |   |   |   |   |   |   |   |   |   |   |   |   |   |   |   |   |   |   |   |   |   |   |   |   |   |   |   |   |   |
